# Supplementary material for: Official Documents- Disbursement Letter for IDF Grant TF010771
Source: Springer Nature journal article supplement (doi:10.1007/s40744-021-00418-5), 2012-04-17
Supplement: MOESM1 [file 40744_2021_418_MOESM1_ESM.pdf]

## **Effectiveness of Etanercept in Rheumatoid Arthritis: Real-World Data From the German Non-Interventional Study ADEQUATE With Focus on Treat-to-Target and Patient-Reported Outcomes**

Eugen Feist<sup>1\*</sup> • Xenofon Baraliakos<sup>2</sup> • Frank Behrens<sup>3</sup> • Diamant Thaçi<sup>4</sup> • Thilo Klopsch<sup>5</sup> • Anja Plenske<sup>6</sup> • Lisa K. Blindzellner<sup>6</sup> • Pascal Klaus<sup>6</sup> • Thomas Meng<sup>6</sup> • Peter-Andreas Löschmann<sup>6†</sup>

<sup>1</sup> Helios Fachklinik, Vogelsang-Gommern, Germany; Department of Rheumatology and Clinical Immunology, Charité – Universitätsmedizin, Berlin, Germany; Otto-von-Guericke University, Magdeburg, Germany

<sup>2</sup> Rheumatology Center Ruhrgebiet Herne, Ruhr-University Bochum, Germany

<sup>3</sup> CIRI/Rheumatology & Fraunhofer IME, Institute for Translational Medicine & Pharmacology, Goethe University Hospital, Frankfurt/Main, Germany

<sup>4</sup> Institute and Comprehensive Center Inflammation Medicine, University of Lübeck, Lübeck, Germany

<sup>5</sup> Rheumatology Practice, Neubrandenburg, Germany

<sup>6</sup> Pfizer Pharma GmbH, Berlin, Germany

† At time of study conduct.

\* **Corresponding author:** Prof. Eugen Feist, E-mail: [eugen.feist@helios-gesundheit.de](mailto:eugen.feist@helios-gesundheit.de)

**Supplementary Table S1** Overview of data from routine clinical practice

|                                                      | <b>Visit 1<br/>week 0</b> | <b>Visit 2<br/>week 12</b> | <b>Visit 3<br/>week 24</b> | <b>Visit 4<br/>week 36</b> | <b>Visit 5<br/>week 52</b> |
|------------------------------------------------------|---------------------------|----------------------------|----------------------------|----------------------------|----------------------------|
| Medical history                                      | x                         |                            |                            |                            |                            |
| Participation in the 'TOGETHER' program <sup>a</sup> | x                         |                            |                            |                            |                            |
| Inclusion/exclusion criteria                         | x                         |                            |                            |                            |                            |
| Treatment/medications                                |                           |                            |                            |                            |                            |
| Prior treatment                                      | x                         |                            |                            |                            |                            |
| Treatment with etanercept                            | x                         | x                          | x                          | x                          | x                          |
| Concomitant treatment                                |                           | x                          | x                          | x                          | x                          |
| <b>Safety parameters</b>                             |                           |                            |                            |                            |                            |
| Physical examination                                 | x                         |                            |                            |                            |                            |
| Laboratory                                           | x                         | x                          | x                          | x                          | x                          |
| AE documentation                                     |                           | x                          | x                          | x                          | x                          |
| <b>Effectiveness</b>                                 |                           |                            |                            |                            |                            |
| Examination of joints                                | x                         | x                          | x                          | x                          | x                          |
| Morning stiffness                                    | x                         | x                          | x                          | x                          | x                          |
| Patient and physician global assessment              | x                         | x                          | x                          | x                          | x                          |
| Pain                                                 | x                         | x                          | x                          | x                          | x                          |
| Fatigue                                              | x                         | x                          | x                          | x                          | x                          |
| <b>Health outcomes</b>                               |                           |                            |                            |                            |                            |
| FFbH                                                 | x                         | x                          | x                          | x                          | x                          |
| PHQ-2                                                | x                         | x                          | x                          | x                          | x                          |

<sup>a</sup> The 'TOGETHER' program, sponsored by Pfizer, aims to improve patient treatment compliance by special trainings and engagements

AE adverse event, *FFbH* Hannover Functional Questionnaire, *PHQ-2* Patient Health Questionnaire-2

**Supplementary Table S2** Number of patients recorded at each visit

| <b>Time point</b> | <b>Number of patients documented, <i>n</i> (%)<sup>a</sup></b> |
|-------------------|----------------------------------------------------------------|
| Visit 1 (week 0)  | 824 (100.0)                                                    |
| Visit 2 (week 12) | 799 (97.0)                                                     |
| Visit 3 (week 24) | 672 (81.6)                                                     |
| Visit 4 (week 36) | 568 (68.9)                                                     |
| Visit 5 (week 52) | 508 (61.7)                                                     |

<sup>a</sup> Includes patients who discontinued (for any reason), therefore number of patients documented includes patients listed at non-completers for this visit

**Supplementary Table S3** Common (> 3% of patients) concomitant medications<sup>a</sup> given at least once during the study treatment period

|                            | <b>Patients with RA<br/>(N = 824)</b> |
|----------------------------|---------------------------------------|
| Any concomitant medication | 743 (90.2)                            |
| Methotrexate               | 379 (46.0)                            |
| Prednisolone               | 260 (31.6)                            |
| Folic acid                 | 135 (16.4)                            |
| Colecalciferol             | 122 (14.8)                            |
| Ibuprofen                  | 70 (8.5)                              |
| Pantoprazole               | 67 (8.1)                              |
| Metamizole                 | 57 (6.9)                              |
| Diclofenac                 | 48 (5.8)                              |
| Etoricoxib                 | 45 (5.5)                              |
| Prednisone                 | 39 (4.7)                              |
| Leflunomide                | 36 (4.4)                              |
| Levothyroxine              | 35 (4.2)                              |
| Ramipril                   | 34 (4.1)                              |
| Celecoxib                  | 30 (3.6)                              |
| Bisoprolol                 | 30 (3.6)                              |
| Valoron n /00628301        | 29 (3.5)                              |
| Acetylsalicylic acid       | 27 (3.3)                              |

<sup>a</sup> Concomitant medications were documented as free text, coded according to the World Health Organization – Drug Dictionary and analyzed by International Nonproprietary Name

RA, rheumatoid arthritis

**Supplementary Table S4** Concomitant diseases recorded at baseline<sup>a</sup>

| <b>Concomitant diseases, n (%)</b>               |            |
|--------------------------------------------------|------------|
| Vascular disorders                               | 343 (41.6) |
| Hypertension                                     | 296 (35.9) |
| Essential hypertension                           | 37 (4.5)   |
| Musculoskeletal and connective tissue disorders  | 297 (36.0) |
| Osteoarthritis                                   | 108 (13.1) |
| Osteoporosis                                     | 98 (11.9)  |
| Metabolism and nutrition disorders               | 231 (28.0) |
| Type 2 diabetes mellitus                         | 71 (8.6)   |
| Obesity                                          | 37 (4.5)   |
| Endocrine disorders                              | 96 (11.7)  |
| Hypothyroidism                                   | 38 (4.6)   |
| Respiratory, thoracic, and mediastinal disorders | 93 (11.3)  |
| Chronic obstructive pulmonary disease            | 34 (4.1)   |
| Asthma                                           | 31 (3.8)   |
| Cardiac disorders                                | 91 (11.0)  |
| Coronary artery disease                          | 41 (5.0)   |
| Psychiatric disorders                            | 66 (8.0)   |
| Depression                                       | 48 (5.8)   |
| Nervous system disorders                         | 74 (9.0)   |
| Renal and urinary disorders                      | 64 (7.8)   |
| Chronic kidney disease                           | 37 (4.5)   |
| Surgical and medical procedures                  | 62 (7.5)   |
| Gastrointestinal disorders                       | 49 (5.9)   |
| Infections and infestations                      | 34 (4.1)   |
| Neoplasms (benign, malignant, and unspecified)   | 33 (4.0)   |
| Hepatobiliary disorders                          | 28 (3.4)   |
| Skin and subcutaneous tissue disorders           | 26 (3.2)   |

<sup>a</sup> Concomitant diseases were documented as free text entries, coded according to MedDRA and tabulated by primary system organ class and preferred term (up to two most common preferred terms). Only conditions occurring in  $\geq 3\%$  of patients are included in the table.

MedDRA Medical Dictionary for regulatory Activities

**Supplementary Table S5** Disease activity in patients with RA according to alternative disease activity scores

| <b>Disease activity score, <i>n</i> (%)</b> |             |                 |                                           |                                     |                                      |                                  |
|---------------------------------------------|-------------|-----------------|-------------------------------------------|-------------------------------------|--------------------------------------|----------------------------------|
| <b>SDAI</b>                                 | <b>Week</b> | <b><i>n</i></b> | <b>SDAI remission<br/>(≤ 3.3)</b>         | <b>Low SDAI<br/>(&gt; 3.3–11.0)</b> | <b>Moderate SDAI<br/>(11.1–26.0)</b> | <b>High SDAI<br/>(&gt; 26.0)</b> |
|                                             |             | 0               | 809                                       | 0 (0.0)                             | 46 (5.7)                             | 336 (41.5)                       |
|                                             | 12          | 794             | 64 (8.1)                                  | 270 (34.0)                          | 261 (32.9)                           | 61 (7.7)                         |
|                                             | 24          | 664             | 75 (11.3)                                 | 293 (44.1)                          | 158 (23.8)                           | 42 (6.3)                         |
|                                             | 36          | 561             | 72 (12.8)                                 | 264 (47.1)                          | 134 (23.9)                           | 30 (5.3)                         |
|                                             | 52          | 502             | 83 (16.5)                                 | 258 (51.4)                          | 90 (17.9)                            | 27 (5.4)                         |
| <b>CDAI</b>                                 | <b>Week</b> | <b><i>n</i></b> | <b>CDAI remission<br/>(≤ 2.8)</b>         | <b>Low CDAI<br/>(&gt; 2.8–10.0)</b> | <b>Moderate CDAI<br/>(10.1–22.0)</b> | <b>High CDAI<br/>(&gt; 22.0)</b> |
|                                             |             | 0               | 809                                       | 0 (0.0)                             | 46 (5.7)                             | 293 (36.2)                       |
|                                             | 12          | 794             | 73 (9.2)                                  | 311 (39.2)                          | 263 (33.1)                           | 94 (11.8)                        |
|                                             | 24          | 664             | 97 (14.6)                                 | 328 (49.4)                          | 180 (27.1)                           | 64 (9.6)                         |
|                                             | 36          | 561             | 91 (16.2)                                 | 304 (54.2)                          | 146 (26.0)                           | 46 (8.2)                         |
|                                             | 52          | 502             | 100 (19.9)                                | 293 (58.4)                          | 106 (21.1)                           | 34 (6.8)                         |
| <b>ACR/<br/>EULAR</b>                       | <b>Week</b> | <b><i>n</i></b> | <b>Remission criteria<sup>a</sup> met</b> |                                     | <b>Remission criteria not met</b>    |                                  |
|                                             |             | 0               | 806                                       | 1 (0.1)                             | 805 (99.9)                           |                                  |
|                                             | 12          | 780             | 9 (1.2)                                   | 771 (98.8)                          |                                      |                                  |
|                                             | 24          | 651             | 19 (2.9)                                  | 632 (97.1)                          |                                      |                                  |
|                                             | 36          | 543             | 19 (3.5)                                  | 524 (96.5)                          |                                      |                                  |
|                                             | 52          | 485             | 17 (3.5)                                  | 468 (96.5)                          |                                      |                                  |

<sup>a</sup> TJC ≤ 1, SJC ≤ 1, CRP ≤ 1 mg/dL, patient global assessment of disease activity ≤ 10.

ACR American College of Rheumatology, CDAI Clinical Disease Activity Index, CRP C-reactive protein, EULAR European League Against Rheumatism, RA rheumatoid arthritis, SDAI Simple Disease Activity Index, SJC swollen joint count, TJC tender joint count

**Supplementary Table S6A** Logistic regression analysis on patients with RA with DAS28 > 3.2 at week 36

| Parameter                               | Category              | Pr > chi-square | Wald CI for parameters |                       | Wald CI for odds ratios                       |          |                       |
|-----------------------------------------|-----------------------|-----------------|------------------------|-----------------------|-----------------------------------------------|----------|-----------------------|
|                                         |                       |                 | Estimate               | 95% confidence limits | Compared categories                           | Estimate | 95% confidence limits |
| Duration of disease (years)             |                       | 0.835           | 0.004                  | -0.032, 0.039         |                                               | 1.004    | 0.969, 1.040          |
| Disease activity at baseline            | Mild <sup>a</sup>     | 0.083           | -2.350                 | -5.007, 0.307         | Mild <sup>a</sup> vs. Severe <sup>c</sup>     | 0.095    | 0.007, 1.360          |
|                                         | Moderate <sup>b</sup> | 0.018           | -1.101                 | -2.012, -0.190        | Moderate <sup>b</sup> vs. Severe <sup>c</sup> | 0.332    | 0.134, 0.827          |
| Patient assessment fatigue              |                       | 0.618           | -0.005                 | -0.023, 0.014         |                                               | 0.995    | 0.977, 1.014          |
| Patient assessment pain activity        |                       | 0.383           | 0.016                  | -0.020, 0.053         |                                               | 1.017    | 0.980, 1.055          |
| Patient assessment disease activity     |                       | 0.969           | 0.001                  | -0.042, 0.043         |                                               | 1.001    | 0.959, 1.044          |
| Physician's assessment disease activity |                       | 0.095           | -0.027                 | -0.059, 0.005         |                                               | 0.973    | 0.942, 1.005          |
| PHQ-2 score                             |                       | 0.520           | 0.109                  | -0.222, 0.439         |                                               | 1.115    | 0.801, 1.552          |

<sup>a</sup> DAS28 ≤ 3.2

<sup>b</sup> DAS28 > 3.2–5.1

<sup>c</sup> DAS28 > 5.1

CI confidence interval, DAS28 Disease Activity Score in 28 joints, PHQ-2 Patient Health Questionnaire-2, RA rheumatoid arthritis

**Supplementary Table S6B** Logistic regression analysis on patients with RA with DAS28 > 3.2 at week 52

| Parameter                               | Category                                 | Pr > chi-square | Wald CI for parameters |                       |       | Wald CI for odds ratios                                             |          |                       |       |
|-----------------------------------------|------------------------------------------|-----------------|------------------------|-----------------------|-------|---------------------------------------------------------------------|----------|-----------------------|-------|
|                                         |                                          |                 | Estimate               | 95% confidence limits |       | Compared categories                                                 | Estimate | 95% confidence limits |       |
| Duration of disease (years)             |                                          | 0.097           | 0.049                  | -0.009,               | 0.107 |                                                                     | 1.050    | 0.991,                | 1.112 |
| Disease activity at baseline            | Mild <sup>a</sup> /Moderate <sup>b</sup> | 0.365           | -0.586                 | -1.854,               | 0.681 | Mild <sup>a</sup> /Moderate <sup>b</sup><br>vs. Severe <sup>c</sup> | 0.556    | 0.157,                | 1.977 |
| Patient assessment fatigue              |                                          | 0.272           | 0.012                  | -0.009,               | 0.033 |                                                                     | 1.012    | 0.991,                | 1.034 |
| Patient assessment pain activity        |                                          | 0.352           | -0.020                 | -0.061,               | 0.022 |                                                                     | 0.981    | 0.941,                | 1.022 |
| Patient assessment disease activity     |                                          | 0.132           | 0.032                  | -0.010,               | 0.074 |                                                                     | 1.033    | 0.990,                | 1.077 |
| Physician's assessment disease activity |                                          | 0.568           | -0.012                 | -0.055,               | 0.030 |                                                                     | 0.988    | 0.946,                | 1.031 |
| PHQ-2 score                             |                                          | 0.440           | -0.145                 | -0.514,               | 0.224 |                                                                     | 0.865    | 0.598,                | 1.250 |

<sup>a</sup> DAS28 ≤ 3.2

<sup>b</sup> DAS28 > 3.2–5.1

<sup>c</sup> DAS28 > 5.1

CI confidence interval, DAS28 Disease Activity Score in 28 joints, PHQ-2 Patient Health Questionnaire-2, RA rheumatoid arthritis



**Supplementary Table S7** List of all investigators of the ADEQUATE study<sup>a</sup>

| <b>Investigator</b>      | <b>Location<sup>b</sup></b>                                                            |
|--------------------------|----------------------------------------------------------------------------------------|
| Martin Hesse             | Bad Kreuznach                                                                          |
| Reiner Kurthen           | Aachen                                                                                 |
| Elke Wilden              | Köln                                                                                   |
| Arnold Bussmann          | Geilenkirchen                                                                          |
| Matthias Hemmerich       | Aachen                                                                                 |
| Martin Welcker           | Planegg                                                                                |
| Wolfgang Thies           | Herrsching                                                                             |
| Klaus Krueger            | München                                                                                |
| Sandra Senger            | Wunstorf                                                                               |
| Rolf-Wilhelm Budde       | Bückerburg                                                                             |
| Uwe Schwichtenberg       | Bremen                                                                                 |
| Wilfried Steinborn       | Straubing                                                                              |
| Juergen Kloos            | Neuwied                                                                                |
| Volker Riesopp           | Duisburg                                                                               |
| Ilona Bebnowski          | Dortmund                                                                               |
| Karin Manger             | Bamberg                                                                                |
| Maria-Anna Schleussner   | Heilbad Heiligenstadt                                                                  |
| Adelheid Melzer          | Seesen                                                                                 |
| Michael Koch             | Erfurt                                                                                 |
| Walter Behringer         | Fulda                                                                                  |
| Lothar Meier             | Hofheim                                                                                |
| Alexander MESSIS         | Bad Homburg                                                                            |
| Christine Baumann        | Plauen                                                                                 |
| Mechthild Straub         | Kronach                                                                                |
| Wolfgang Ochs            | Bayreuth                                                                               |
| Werner Harmuth           | Marktredwitz                                                                           |
| Matthias Schmitt-Haendle | Bayreuth                                                                               |
| Elke Braeunig            | Kahla                                                                                  |
| Andreas Kapelle          | Hoyerswerda                                                                            |
| Kathrin Winkler          | Bautzen                                                                                |
| Sabine Balzer            | Bautzen                                                                                |
| Katrin Geissler          | Cottbus                                                                                |
| Kirsten Luethke          | Dresden                                                                                |
| Holger Schwenke          | Rheumatologisches MVZ Dresden GmbH im Gesundheitszentrum Dresden<br>– Klotzsche (GZDK) |
| Steffen Fischer          | Dresden                                                                                |
| Anett Graessler          | Pirna                                                                                  |

| <b>Investigator</b>                            | <b>Location<sup>b</sup></b> |
|------------------------------------------------|-----------------------------|
| Anke Liebhaber                                 | Halle                       |
| Christian Herzberg                             | Berlin                      |
| Divshali-Mohsen Bozorg                         | Berlin                      |
| Jan Brandt-Juergens                            | Berlin                      |
| Silke Zinke                                    | Berlin                      |
| Dirk Wernicke                                  | Hohen Neuendorf             |
| Michael Schnorfeil                             | Berlin                      |
| Sven Remstedt                                  | Berlin                      |
| Uta Merkel                                     | Königs Wusterhausen         |
| Andreas Reck                                   | Mittelherwigsdorf           |
| Beate Roch                                     | Dresden                     |
| Bettina Pech                                   | Eberswalde                  |
| Angela Seifert                                 | Berlin                      |
| Ilka Schwarze                                  | Leipzig                     |
| Thomas Kupka                                   | Altenburg                   |
| Sylvia Berger                                  | Naunhof                     |
| Frank Zeiger                                   | Leipzig                     |
| Wolf Rainer Raub                               | Münster                     |
| Brigitte Otte                                  | Wesel                       |
| Frank Schumann                                 | Reken                       |
| Markus Voglau                                  | Oldenburg                   |
| Uwe Mall                                       | Bremen                      |
| Gabriele Lorenz                                | Chemnitz                    |
| Henry Fricke-Wagner                            | Zwickau                     |
| Michael Mueller                                | Freiberg                    |
| Bernd Haeckel                                  | Frankenberg                 |
| Kerstin Weiss<br>Volker Schrader (Previous PI) | Lichtenstein                |
| Michael Hoehne                                 | Fraureuth                   |
| Kathrin Oppers                                 | Dresden                     |
| Beatrice Gerlach                               | Dresden                     |
| Franca Wiemers                                 | Leipzig                     |
| Olaf Heidlas                                   | Dessau                      |
| Dietrich Barth                                 | Borna                       |
| Karolin Schneider                              | Chemnitz                    |
| Martin Miehe                                   | Berlin                      |
| Christian Kors                                 | Berlin                      |
| Lars Freitag                                   | Falkensee                   |
| Raoul Hasert                                   | Berlin                      |

| <b>Investigator</b>  | <b>Location<sup>b</sup></b> |
|----------------------|-----------------------------|
| Dietrich Metz        | Wittstock                   |
| Birgit Zimmermann    | Malchow                     |
| Birgit Berendt       | Eberswalde                  |
| Anke Raschke         | Magdeburg                   |
| Jutta Ramaker-Brunke | Braunschweig                |
| Mario Pawlak         | Heilbad Heiligenstadt       |
| Siegfried Wassenberg | Ratingen                    |
| Georg Dahmen         | Hamburg                     |
| Thomas Legler        | Luebeck                     |
| Matthias Boehm       | Altenholz                   |
| Jochen Walter        | Rendburg                    |
| Ulrich Schwab        | Kiel                        |
| Angela Gause         | Bad Bramstedt               |
| Thilo Klopsch        | Neubrandenburg              |
| Ryszard Pyra         | Torgelow                    |
| Ann-Dorthe Holst     | Ludwigslust                 |
| Eckhart Mobius       | Schwerin                    |
| Charlotte Moebius    | Schwerin                    |
| Detlef Scholz        | Neustadt-Glewe              |
| Elisabeth Staender   | Schwerin                    |
| Matthias Richter     | Rostock                     |
| Doreen Lankow        | Rostock                     |
| Peer Aries           | Hamburg                     |
| Uwe Schwokowski      | Ratzeburg                   |
| Thomas Schuart       | Wissen/ Luhe                |
| Christoph Weinhardt  | Hamburg                     |
| Andreas Engel        | Stuttgart                   |
| Maren Sieburg        | Magdeburg                   |
| Cornelia Kuehne      | Haldensleben                |
| Christina Eisterhues | Braunschweig                |
| Werner Biewer        | Saarbrücken                 |
| Bernhard Heilig      | Heidelberg                  |
| Doris Lassak-Siedl   | Heidelberg                  |
| Ulrike Stein         | Hannover                    |
| Harald Strothmeyer   | Düsseldorf                  |
| Markus Vollmer       | Monchengladbach             |
| Claas Fendler        | Duisburg                    |
| Herwig Rumpel        | Regensburg                  |

| <b>Investigator</b>                                 | <b>Location<sup>b</sup></b>                                                     |
|-----------------------------------------------------|---------------------------------------------------------------------------------|
| Mathias Kirrstetter                                 | Deggendorf                                                                      |
| Martin Feuchtenberger                               | Burghausen                                                                      |
| Karl-Heinz Alliger                                  | Zwiesel                                                                         |
| Ingrid Koelnerberger                                | Bogen                                                                           |
| Gunther Zeh                                         | Geislingen a. d. Steige                                                         |
| Nadia Rinaldi                                       | Ulm / Donau                                                                     |
| Sebastian Albert                                    | Offenburg                                                                       |
| Uta Fritsch                                         | Frankfurt                                                                       |
| Thomas Marycz                                       | Amberg                                                                          |
| Carlo Weimann                                       | Magdeburg                                                                       |
| Torsten Kudela                                      | Magdeburg                                                                       |
| Andreas Schwarting                                  | ACURA Rheumazentrum Bad Kreuznach                                               |
| Inka Vallbracht<br>Blanche Piper (Previous PI)      | Stadt Klinikum Muenchen                                                         |
| Andreas Koerber                                     | Universitaetsklinikum Essen                                                     |
| Eoers Szabo                                         | Hamm                                                                            |
| Rainer Schult<br>Joerg Brinkmann (Previous PI)      | Gladbeck                                                                        |
| Katalin Winkler-Gyulay                              | Unna                                                                            |
| Peter Kaestner                                      | Erfurt                                                                          |
| Torsten Eidner                                      | Uniklinik Jena                                                                  |
| Elvira Decker                                       | Gesundheits- und Pflegezentrum Alsfeld                                          |
| Andreas Krause                                      | Rheumaklinik Berlin-Buch                                                        |
| Sabine Reckert                                      | Rheumahaushaus Potsdam                                                          |
| Alexander Scheibert                                 | MVZ der Johanniter Treuenbrietzen                                               |
| Eugen Feist                                         | Charité Berlin Rheumatologie und Klinische Immunologie                          |
| Anne Bruns                                          | Medizinisches Versorgungszentrum Ambulantes Gesundheitszentrum Berlin           |
| Birgit Kittel                                       | Elbe Elster MVZ, Elsterwerda                                                    |
| Konrad Boche                                        | Leipzig                                                                         |
| Astrid Thiele                                       | Klinikverbund St. Antonius und St. Josef GmbH, Krankenhaus St. Josef, Wuppertal |
| Christof Iking-Konert<br>Frank Moosig (Previous PI) | Klinikum Bad Bramstedt                                                          |
| Helge Koerber                                       | Asklepios MVZ Nord SH GmbH, c/o AK St. Georg, Elmshorn                          |
| Hans-Hartwig Euler                                  | MVZ Rheumatologie und Autoimmunmedizin GmbH, Hamburg                            |
| Harald Tremel                                       | MVZ Nord GmbH, Hamburg                                                          |
| Helmut Buehre                                       | Katholisches Marienkrankenhaus Geriatriische Klinik, Hamburg                    |
| Regina Max                                          | Universitätsklinikum Heidelberg                                                 |
| Ulrich Prothmann                                    | Knappschaftskrankenhaus Püttlingen                                              |

| <b>Investigator</b>                            | <b>Location<sup>b</sup></b>                                                                        |
|------------------------------------------------|----------------------------------------------------------------------------------------------------|
| Andreas Pinter                                 | Klinikum der J.W. Goethe-Universität, Klinik für Dermatologie, Klinische Forschung, Frankfurt/Main |
| Florian Haas                                   | Tübingen                                                                                           |
| Joerg Henes                                    | Universitätsklinikum Tübingen                                                                      |
| Steffen Briem                                  | Kreiskrankenhaus Langenau                                                                          |
| Markus Roeser, Constanze Richter (Previous PI) | ZIRS - Zentrum für Interdisziplinäre Rheumatologie Stuttgart                                       |
| Anne-Katrin Rossbach                           | Mansfeld                                                                                           |
| Petra Roll                                     | Ulm / Donau                                                                                        |
| Petra Staubach-Renz                            | Hautklinik der Universitätsmedizin Mainz KöR, Clinical Research Center                             |
| Ralph von Kiedrowski                           | Company for Medical Study&Service Selters                                                          |
| Jens Rossbacher                                | Berlin                                                                                             |
| Heike Mauer                                    | Kamenz                                                                                             |
| Igor Turin                                     | Karlstadt                                                                                          |
| Peter Wagener                                  | Bruchhausen-Vilsen                                                                                 |
| Reinhard Hein                                  | Nienburg                                                                                           |
| Guido Hoese                                    | Stadthagen                                                                                         |
| Stephanie Boeddeker                            | Marl                                                                                               |
| Carsten Stille                                 | Hannover                                                                                           |
| Rainer Sprekeler                               | Zeven                                                                                              |
| Carsten Petersen                               | Potsdam                                                                                            |
| Susanne Kotterik                               | Reutlingen                                                                                         |
| Maren Hoene                                    | Rostock                                                                                            |
| Sandra Vogel                                   | Nürnberg                                                                                           |
| Werner Kremers                                 | Jülich                                                                                             |
| Kora Hahn                                      | Bezirksklinikum Obermain Kutzenberg, Ebensfeld                                                     |
| Michael Fiene                                  | Kreiskrankenhaus Demmin GmbH                                                                       |
| Helga Streibl                                  | Holzkirchen                                                                                        |
| Swen Jacki                                     | Tübingen                                                                                           |
| Thomas Abahji                                  | Germering                                                                                          |
| Rainer Fahr                                    | Suhl                                                                                               |
| Maria Hoehle                                   | Hamburg                                                                                            |
| Frank Moosig                                   | Neumünster                                                                                         |
| Ulrich Kaesser                                 | Giessen                                                                                            |
| Parysa Alborz                                  | Köln                                                                                               |

<sup>a</sup> Includes investigators who recruited patients with axial spondyloarthritis, psoriatic arthritis, and plaque psoriasis.

<sup>b</sup> Unless specified otherwise, investigators were based at private practices.

**Supplementary Fig. 1** Course of disease in patients with RA (LOCF)

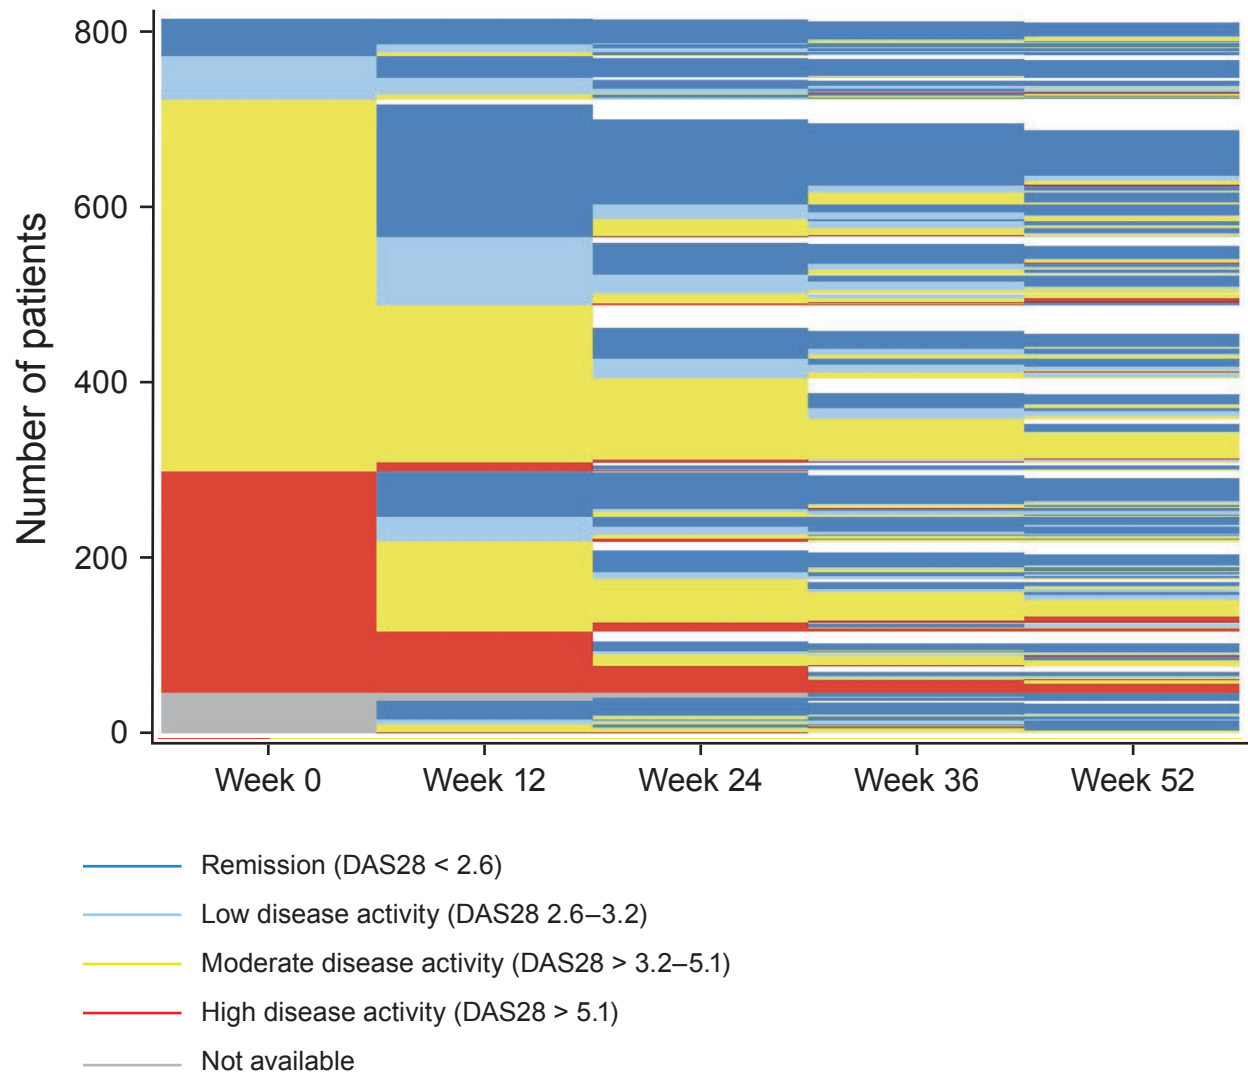

DAS28, Disease Activity Score in 28 joints; LOCF, last observation carried forward; RA, rheumatoid arthritis
